# Supplementary material for: DDA-SKF: Predicting Drug–Disease Associations Using Similarity Kernel Fusion
Source: Front Pharmacol. 2022 Jan 13;12:784171. doi: 10.3389/fphar.2021.784171 (PMC8792612; doi:10.3389/fphar.2021.784171)
Supplement: Supplementary file 2 [file Table3.XLSX]

## Sheet: TableS3
Orphan drugs(Names)	Diseases(OMIM IDs)
Celecoxib	140600
Celecoxib	165720
Celecoxib	208230
Celecoxib	607459
Celecoxib	607850
Celecoxib	266600
Celecoxib	147530
Celecoxib	276300
Celecoxib	161900
Celecoxib	167320
Celecoxib	602080
Celecoxib	604416
Celecoxib	215140
Celecoxib	600351
Celecoxib	104130
Celecoxib	254500
Celecoxib	217200
Celecoxib	157300
Celecoxib	247640
Celecoxib	102500
Methotrexate	276300
Methotrexate	114480
Methotrexate	247640
Methotrexate	109100
Methotrexate	604416
Methotrexate	114500
Methotrexate	144700
Methotrexate	137215
Methotrexate	144010
Methotrexate	166760
Methotrexate	208550
Methotrexate	601367
Methotrexate	266600
Methotrexate	176807
Methotrexate	600263
Methotrexate	223350
Methotrexate	217200
Methotrexate	109543
Methotrexate	151400
Methotrexate	191390
Doxorubicin	276300
Doxorubicin	247640
Doxorubicin	223350
Doxorubicin	114480
Doxorubicin	601626
Doxorubicin	148000
Doxorubicin	236000
Doxorubicin	109800
Doxorubicin	182280
Doxorubicin	137215
Doxorubicin	166760
Doxorubicin	176807
Doxorubicin	144700
Doxorubicin	109543
Doxorubicin	273300
Doxorubicin	194070
Doxorubicin	147530
Doxorubicin	604416
Doxorubicin	155600
Doxorubicin	155601
